# Supplementary material for: Maternal iron deficiency and neonatal health: a pilot study
Source: Research Square preprint supplement (doi:10.21203/rs.3.rs-7358801/v1), 2025-09-30
Supplement: Supplementary file 1 [file b3d6615283082411ae6b283b.docx]

**Appendix 1. The electronic questionnaire form in MATILDA-main study.**

**MATILDA -** **Effects of maternal iron deficiency and iron supplement therapy to offspring health in short and long term**

Electronic survey via OmaTays. Responding to the survey requires that you give your electronic consent. Answering the survey takes approximately 10 minutes. Survey responses will be processed confidentially and in a way that the respondent cannot be identified based on the survey (pseudonymized).

When answering the survey, think about your current pregnancy / past pregnancy that has just ended with delivery.

1. Were you diagnosed with iron deficiency during this pregnancy /your recently ended pregnancy (low ferritin level, low hemoglobin below 110 g/l, symptoms suitable for iron deficiency)?

1. Yes

2. No

9. I don't know

2. Were you diagnosed with iron deficiency anemia during this last pregnancy (hemoglobin below 110 g/l)?

1. Yes

2. No

9. I don't know

3. Did you use iron tablets or other iron-containing dietary supplements during this pregnancy?

For example, liquid iron preparation or multivitamin tablets containing iron.

1. Yes

2. No

9. I don't know

4. When did you use iron supplements (during this pregnancy)? Select all suitable options.

Iron tablets or, for example, liquid iron preparation or multivitamin tablets containing iron.

a) in the last 3 months of pregnancy

b) in the last 6 months of pregnancy

c) in the early pregnancy

5. What iron supplement did you primarily use (during this pregnancy)? Write the name of the product and dosage, as accurately as you remember, in the designated fields.

*Please fill in the name of the iron preparation that you used for the longest time.*

Product name:

Dosage (in milligrams, how many times a day?):

6. Have you received iron infusion during this pregnancy, meaning have you been given iron into the vein?

1. Yes, once

2. Yes, two times or more

3. No

7. Have you used a dietary supplement containing folic acid during this pregnancy?

For example, multivitamin tablets containing folic acid.

1. Yes

2. No

9. I don't know

8. What folic acid supplement have you primarily used (during this pregnancy)? Write the name of the product and dosage, as accurately as you remember, in the designated fields.

*Please fill in the name of the folic acid preparation that you used for the longest time.*

Product name:

Dosage (in micrograms, how many times a day):

9. Have you used any other dietary supplements or vitamins during this pregnancy?

1. Yes

2. No

9. I don't know

10. Did you use any of the following during this pregnancy:

*Please select all suitable options regarding supplements containing other than solely iron or folic acid.*

1. Multivitamin tablets

2. Liquid multivitamin supplement

3. Probiotics

4. Other, what____________

5. I did not use any other dietary supplements or vitamins (besides iron or folic acid).

9. I don't know.

11. What dietary supplements or vitamins have you used?

*Please write the names of the products in the field below.*

12. Did you use any other medication regularly during pregnancy?

Refers to medication that lasted continuously for more than 1 week.

1. Yes

2. No

9. I don't know.

13. What medications did you use regularly during this pregnancy?

*Refers to medication that lasted continuously for more than one week.*

*Please write the medication and its dosage in the designated fields.*

| *Medication* | *Dosage* | *Duration of Medication* |
| --- | --- | --- |
|  |  |  |
|  |  |  |
|  |  |  |
|  |  |  |
|  |  |  |

14. Did you smoke daily or occasionally during this pregnancy (cigarettes, nicotine-containing e-cigarettes, cigars, pipes)?

*Please select all applicable options if you smoked during pregnancy.*

a. No, I have never smoked.

b. Not at all, I quit smoking before this pregnancy.

i. Year of quitting smoking: _____________

c. Yes, I smoked daily or occasionally during the first trimester of this pregnancy (weeks 1-12).

d. Yes, I smoked daily or occasionally during the second trimester of this pregnancy (weeks 13-24).

e. Yes, I smoked daily or occasionally during the third trimester of this pregnancy (weeks 25-42).

15. Did you use nicotine products (snuff, snus, nicotine patches, nicotine gum or lozenges, nicotine-containing e-cigarettes) daily or occasionally during this pregnancy?

*Please select all applicable options if you used nicotine products during pregnancy.*

a. No, I have never used nicotine products.

b. Not at all, I quit using nicotine products before this pregnancy.

i. Year of quitting nicotine products: ______________

c. Yes, I used nicotine products daily or occasionally during the first trimester of this pregnancy (weeks 1-12).

d. Yes, I used nicotine products daily or occasionally during the second trimester of this pregnancy (weeks 13-24).

e. Yes, I used nicotine products daily or occasionally during the third trimester of this pregnancy (weeks 25-42).

16. Do you follow any of these special diets?

*Please select from the options below.*

a. Vegetarian diet

b. Pescetarian diet

c. Vegan diet

d. No red meat

e. Other diet, specify: _______________________

17. Do you have any of these chronic illnesses diagnosed?

Refers to a physician-diagnosed illness. Please select all applicable options.

a. Diabetes before pregnancy

b. Gestational diabetes (one or more abnormal values in oral glucose tolerance test or high blood sugar levels in home measurements) *during this pregnancy*

c. Gestational diabetes (one or more abnormal values in oral glucose tolerance test or high blood sugar levels in home measurements) *in a previous pregnancy*

d. Hypothyroidism (underactive thyroid)

e. Hyperthyroidism (overactive thyroid)

f. Celiac disease (gluten intolerance diagnosed with blood tests or gastroscopy)

g. Inflammatory bowel disease (such as Crohn's disease or ulcerative colitis)

h. Any other autoimmune disorder, please specify: __________________________

i. Chronic hypertension

j. Other chronic illness, please specify: __________________________

k. No, I do not have any diagnosed chronic illnesses.

Thank you very much for your valuable response to the maternal iron deficiency research survey!
